# Supplementary material for: Lipoprotein Lipase Activity Does Not Differ in the Serum Environment of Vegans and Omnivores
Source: MDPI journal article supplement (doi:10.3390/nu15122755), 2023-06-15
Supplement: s1 [file s1]

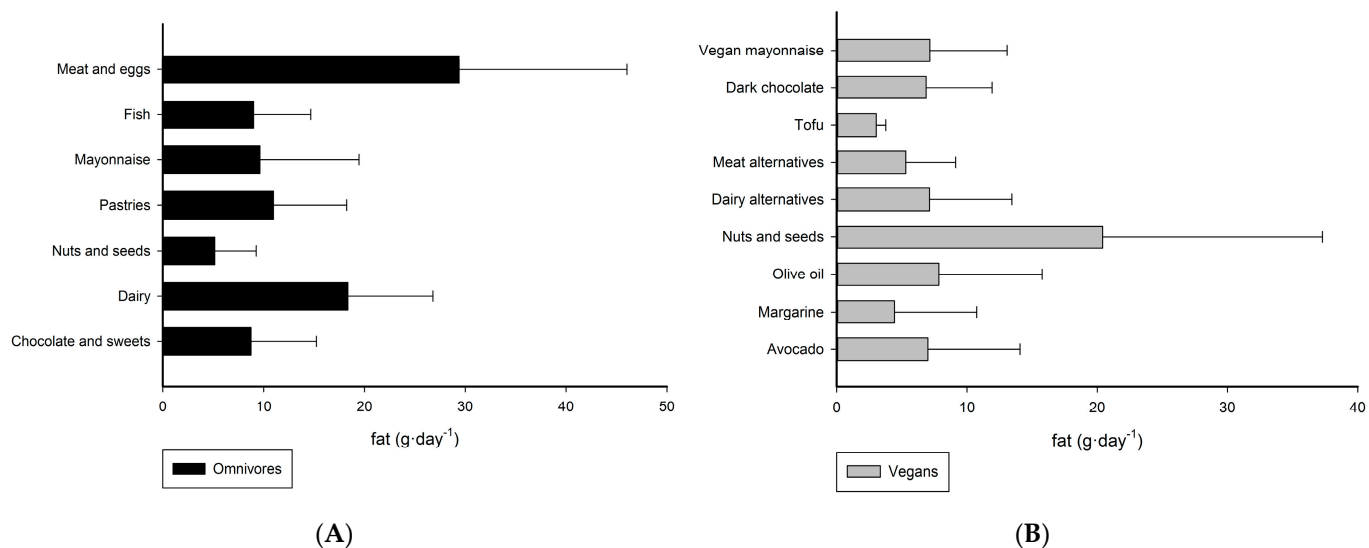

**Figure S1. Mean daily consumption of dietary fat sources in both groups.** The y-axis shows the main dietary fat sources consumed, while the x-axis shows the median daily amount of fat consumed from fat sources. **(A)** The main dietary fat sources in omnivore participants. Meat, eggs and dairy contributed the most to daily fat intake in omnivore participants; **(B)** The main dietary fat sources in vegan participants. Nuts and seeds were the main source of daily fat intake for vegans, followed by olive oil and dairy alternatives.
